# Supplementary material for: Health Disparities, Inpatient Stays, and Emergency Room Visits Among Lesbian, Gay, and Bisexual People: Evidence From a Mental Health System
Source: Atypon-hosted journal article supplement (doi:10.1176/appi.ps.201900188), 2019-10-08
Supplement: appi.ps.201900188.ds001.pdf [file appi.ps.201900188.ds001.pdf]

Chronic physical conditions, serious mental illness, intellectual disability, autism spectrum disability, substance use related disorders.

| <b>Chronic Medical Condition</b> | <b>Diagnosis Code (ICD-10)</b>                                                                                                                                                                                                                                                                                                                                                                                                                                                                                                                                                                                                                                                                                                                                                   |
|----------------------------------|----------------------------------------------------------------------------------------------------------------------------------------------------------------------------------------------------------------------------------------------------------------------------------------------------------------------------------------------------------------------------------------------------------------------------------------------------------------------------------------------------------------------------------------------------------------------------------------------------------------------------------------------------------------------------------------------------------------------------------------------------------------------------------|
| Hyperlipidemia                   | E70-E88 Metabolic disorders (E70-E88)                                                                                                                                                                                                                                                                                                                                                                                                                                                                                                                                                                                                                                                                                                                                            |
| High Blood Pressure              | I10-I16 Hypertensive diseases (I10-I16), O10-O16 hypertensive disorders in pregnancy, childbirth and the puerperium (O10-O16), N262                                                                                                                                                                                                                                                                                                                                                                                                                                                                                                                                                                                                                                              |
| Diabetes                         | E08. _ - Diabetes mellitus due to underlying condition, E09. _ -Drug or chemical induced diabetes mellitus, E13. _ -Other specified diabetes mellitus, E10. _ - Type 1 diabetes mellitus , E11. _ -Type 2 diabetes mellitus                                                                                                                                                                                                                                                                                                                                                                                                                                                                                                                                                      |
| Heart Attack                     | I20-I25 Ischemic heart diseases (I20-I25)                                                                                                                                                                                                                                                                                                                                                                                                                                                                                                                                                                                                                                                                                                                                        |
| Stroke                           | I60-I69 Cerebrovascular diseases (I60-I69)                                                                                                                                                                                                                                                                                                                                                                                                                                                                                                                                                                                                                                                                                                                                       |
| Other Cardiac Condition          | A36 Diphtheria, A38 Scarlet fever, A39 Meningococcal infection, Other viral diseases (B25-B34), Acute rheumatic fever (I00-I02),Chronic rheumatic heart diseases (I05-I09),Hypertensive diseases (I10-I16),Ischemic heart diseases (I20-I25),Pulmonary heart disease and diseases of pulmonary circulation (I26-I28),Other forms of heart disease (I30-I52),Cerebrovascular diseases (I60-I69),Other diseases of intestines (K55-K64),Congenital malformations of the circulatory system (Q20-Q28)<br>Symptoms and signs involving the circulatory and respiratory systems (R00-R09),Encounters for other specific health care (Z40-Z53),Persons with potential health hazards related to family and personal history and certain conditions influencing health status (Z77-Z99) |
| Pulmonary Condition              | J80-J84 Other respiratory diseases principally affecting the interstitium (J80-J84), R00-R09 Symptoms and signs involving the circulatory and respiratory systems (R00-R09), Z77-Z99 Persons with potential health hazards related to family and personal history and certain conditions influencing health status (Z77-Z99)                                                                                                                                                                                                                                                                                                                                                                                                                                                     |
| Kidney Disease                   | B2683, N00-N08 Glomerular diseases (N00-N08), N10-N16 Renal tubulo-interstitial diseases (N10-N16), N17-N19 Acute kidney failure and chronic kidney disease (N17-N19), N20-N23 Urolithiasis (N20-N23), R880,Z40-Z53 Encounters for other specific health care (Z40-Z53)                                                                                                                                                                                                                                                                                                                                                                                                                                                                                                          |
| Endocrine Condition              | E70-E88 Metabolic disorders (E70-E88), E89 Postprocedural endocrine and metabolic complications and disorders, not elsewhere classified (E89)                                                                                                                                                                                                                                                                                                                                                                                                                                                                                                                                                                                                                                    |
| Progressive Neurological         | B0681,E70-E88 Metabolic disorders (E70-E88),Inflammatory diseases of the central nervous system (G00-G09),Systemic atrophies primarily affecting the central nervous system (G10-G14),Extrapyramidal and movement disorders (G20-G26)<br>Other degenerative diseases of the nervous system (G30-G32),Demyelinating diseases of the central nervous system (G35-G37),Episodic and paroxysmal disorders (G40-G47),Cerebral palsy and other paralytic syndromes (G80-G83),Other disorders of the nervous system (G89-G99),Cerebrovascular diseases (I60-I69),Symptoms and signs involving the nervous and musculoskeletal systems (R25-R29),Injuries to the neck (S10-S19),Injuries to the thorax (S20-S29),Injuries to the abdomen, lower back, lumbar spine, pelvis and           |

|                                  |                                                                                                                                                                                                                                                                                                                                                                                                                                                                                                                                                                                                                                                                                                                                                                                                                                                                                                   |
|----------------------------------|---------------------------------------------------------------------------------------------------------------------------------------------------------------------------------------------------------------------------------------------------------------------------------------------------------------------------------------------------------------------------------------------------------------------------------------------------------------------------------------------------------------------------------------------------------------------------------------------------------------------------------------------------------------------------------------------------------------------------------------------------------------------------------------------------------------------------------------------------------------------------------------------------|
|                                  | external genitals (S30-S39)                                                                                                                                                                                                                                                                                                                                                                                                                                                                                                                                                                                                                                                                                                                                                                                                                                                                       |
| Traumatic Brain Injury           | Injuries to the head (S00-S09), Injuries to the abdomen, lower back, lumbar spine, pelvis and external genitals (S30-S39), Symptoms and signs involving cognition, perception, emotional state and behavior (R40-R46), Symptoms and signs involving speech and voice (R47-R49)                                                                                                                                                                                                                                                                                                                                                                                                                                                                                                                                                                                                                    |
| Joint and Connective Tissue      | Arthropathies (M00-M25), Dentofacial anomalies [including malocclusion] and other disorders of jaw (M26-M27), Systemic connective tissue disorders (M30-M36), Dorsopathies (M40-M54), Soft tissue disorders (M60-M79), Osteopathies and chondropathies (M80-M94)<br>Other disorders of the musculoskeletal system and connective tissue (M95), Intraoperative and postprocedural complications and disorders of musculoskeletal system, not elsewhere classified (M96), Periprosthetic fracture around internal prosthetic joint (M97)<br>Biomechanical lesions, not elsewhere classified (M99), Symptoms and signs involving the skin and subcutaneous tissue (R20-R23), Symptoms and signs involving the nervous and musculoskeletal systems (R25-R29), Persons with potential health hazards related to family and personal history and certain conditions influencing health status (Z77-Z99) |
| Cancer                           | Malignant neoplasms (C00-C96), In situ neoplasms (D00-D09), Benign neoplasms, except benign neuroendocrine tumors (D10-D36), Neoplasms of uncertain behavior, polycythemia vera and myelodysplastic syndromes (D37-D48), Benign neuroendocrine tumors (D3A)<br>Neoplasms of unspecified behavior (D49), Intraoperative complications of endocrine system (E36), Abnormal findings on examination of urine, without diagnosis (R80-R82), Abnormal findings on examination of other body fluids, substances and tissues, without diagnosis (R83-R89), Persons with potential health hazards related to family and personal history and certain conditions influencing health status (Z77-Z99)                                                                                                                                                                                                       |
| Other Chronic Medical Conditions | Nutritional anemias (D50-D53), Hemolytic anemias (D55-D59), Aplastic and other anemias and other bone marrow failure syndromes (D60-D64), Coagulation defects, purpura and other hemorrhagic conditions (D65-D69), Other disorders of blood and blood-forming organs (D70-D77), Intraoperative and postprocedural complications of the spleen (D78), Certain disorders involving the immune mechanism (D80-D89), Episodic and paroxysmal disorders (G40-G47), Embedded and impacted teeth, Diseases of oral cavity and salivary glands (K00-K14), Episodic and paroxysmal disorders (G40-G47), Noninfective enteritis and colitis (K50-K52), Other diseases of intestines (K55-K64), Other congenital malformations of the digestive system (Q38-Q45)                                                                                                                                             |
| Obesity                          | Overweight, obesity and other hyperalimentation (E65-E68)                                                                                                                                                                                                                                                                                                                                                                                                                                                                                                                                                                                                                                                                                                                                                                                                                                         |

|                                                                                                                               |                                                                                                                                                                                                                                                                   |
|-------------------------------------------------------------------------------------------------------------------------------|-------------------------------------------------------------------------------------------------------------------------------------------------------------------------------------------------------------------------------------------------------------------|
| Alzheimer or Dementia                                                                                                         | Mental disorders due to known physiological conditions (F01-F09), Mental and behavioral disorders due to psychoactive substance use (F10-F19), Other degenerative diseases of the nervous system (G30-G32)                                                        |
| Physical Disability                                                                                                           | H90.0-H90.A32 Conductive and sensorineural hearing loss, H91.01-H91.93 Other and unspecified hearing loss, Z99 Dependence on enabling machines and devices, not elsewhere classified, H53.001-H53.9 Visual disturbances, H54.0X33-H54.8 Blindness and low vision  |
| Primary psychiatric disorders (schizophrenia spectrum and other psychotic, depressive, bipolar, anxiety, and other disorders) | F20 Schizophrenia, Mental and behavioral disorders due to psychoactive substance use (F10-F19), F30.10-F39 Mood [affective] disorders (F30-F39), F40.00-F48.9 Anxiety, dissociative, stress-related, somatoform and other nonpsychotic mental disorders (F40-F48) |
| Developmental Disability                                                                                                      | Pervasive and specific developmental disorders (F80-F89), Z13 Encounter for screening for other diseases and disorders                                                                                                                                            |
| Intellectual Disability                                                                                                       | R4183, Z810, F70 Mild intellectual disabilities, F71 Moderate intellectual disabilities, F72 Severe intellectual disabilities, F73 Profound intellectual disabilities, F78 Other intellectual disabilities, F79 Unspecified intellectual disabilities             |
| Autism Spectrum Disability                                                                                                    | Z1341                                                                                                                                                                                                                                                             |

#### Inpatient and Emergency Room Service Categorization

| Inpatient Type | Setting                                       | Codes                                                                                                                                                                                                                                                                                                                                                            |
|----------------|-----------------------------------------------|------------------------------------------------------------------------------------------------------------------------------------------------------------------------------------------------------------------------------------------------------------------------------------------------------------------------------------------------------------------|
| Psychiatric    | Psychiatric Inpatient (General Hospital)      | 1. Rate code '2852', '2962', '2963'<br>2. DRG '0425', '0426', '0428', '0430', '0431', '0432' and DRG type = 1 and General Hospital Provider<br>3. DRG '0750', '0751', '0752', '0753', '0754', '0755', '0756', '0758', '0759', '0760' and DRG type=2 and General Hospital Provider<br>4. General Hospital Provider and Primary mental health diagnosis            |
|                | Psychiatric Inpatient (Mental Health Clinics) | 1. Rate code: '2858', '4005', '4006'<br>2. DRG '0425', '0426', '0428', '0430', '0431', '0432' and DRG type=1 and Mental Health Clinic Provider<br>3. DRG '0750', '0751', '0752', '0753', '0754', '0755', '0756', '0758', '0759', '0760' and DRG type=2 and Mental Health Clinic Provider<br>4. Mental Health Clinic Provider and Primary mental health diagnosis |
|                | State Psychiatric                             | 1. Rate Code '4001', '4002', '4003', '4004'                                                                                                                                                                                                                                                                                                                      |

|                            |                                              |                                                                                                                                                                                                                                                                                                                                                                                                                                                                                                                                                            |
|----------------------------|----------------------------------------------|------------------------------------------------------------------------------------------------------------------------------------------------------------------------------------------------------------------------------------------------------------------------------------------------------------------------------------------------------------------------------------------------------------------------------------------------------------------------------------------------------------------------------------------------------------|
|                            | Centers                                      | 2. State PC Provider and Primary MH Diagnosis                                                                                                                                                                                                                                                                                                                                                                                                                                                                                                              |
| Substance Use              | Substance Use Disorders<br>Inpatient Detox   | 1. Rate code '4800', '4805', '4801', '4802', '4803', '4806', '4807', '4808', '4203', '4212', '4220'<br>2. DRG '0770', '0772', '0773', '0774', '0775', '0776' AND Substance Use Disorders inpatient provider<br>3. Procedure code '9462', '9465', '9468', 'HZ2ZZZ', 'HZ93ZZZ', 'HZ96ZZZ' and primary Substance Use Disorders diagnosis and Substance Use Disorders inpatient provider                                                                                                                                                                       |
|                            | Substance Use Disorders<br>Inpatient Rehab   | 1. Rate code '2957', '2993', '2966', '2967', '3118', '3119', '4204', '4213', '4202'<br>2. '-9461', '9463', '9464', '9466', '9467', '9469', 'HZ30ZZZ', 'HZ31ZZZ', 'HZ32ZZZ', 'HZ33ZZZ', 'HZ34ZZZ', 'HZ35ZZZ', 'HZ36ZZZ', 'HZ37ZZZ', 'HZ38ZZZ', 'HZ39ZZZ', 'HZ3BZZZ', 'HZ40ZZZ', 'HZ41ZZZ', 'HZ42ZZZ', 'HZ43ZZZ', 'HZ44ZZZ', 'HZ45ZZZ', 'HZ46ZZZ', 'HZ47ZZZ', 'HZ48ZZZ', 'HZ49ZZZ', 'HZ4BZZZ' AND primary Substance Use Disorders diagnosis AND Substance Use Disorders inpatient provider                                                                   |
|                            | Substance Use Disorders<br>Inpatient General | Primary Substance Use Disorders Diagnosis AND Substance Use Disorders inpatient provider                                                                                                                                                                                                                                                                                                                                                                                                                                                                   |
| Non-Behavioral Health      | Non-Behavioral Inpatient                     | Invoice type '11', '12' and not in mental health, Substance Use Disorders inpatient groups above                                                                                                                                                                                                                                                                                                                                                                                                                                                           |
| <b>Emergency Room Type</b> | <b>Setting</b>                               | <b>Codes</b>                                                                                                                                                                                                                                                                                                                                                                                                                                                                                                                                               |
| Psychiatric                | Psychiatric Emergency Room                   | 1. 'Rate code '1402', '1419', '2879' and Mental Health Diagnosis<br>2. Proc code '99281', '99282', '99283', '99284', '99285' and Mental Health Diagnosis and RECORD_CODE_H002='4' and PROVIDER TYPE CODE IN ('028', 'MLT')<br>3. Spec code '901' and Mental Health Diagnosis and RECORD_CODE_H002='4' and (Category of Service='0287' or PROVIDER TYPE CODE IN ('028', 'MLT'))<br>3. Rev Code '0450', '0451', '0452', '0459' and Mental Health Diagnosis and RECORD_CODE_H002='4' and (Category of Service='0287' or PROVIDER TYPE CODE IN ('028', 'MLT')) |

|                       |                                                    |                                                                                                                                                                                                                                                                                                                                                                                                                                                                                                                                                                                                                             |
|-----------------------|----------------------------------------------------|-----------------------------------------------------------------------------------------------------------------------------------------------------------------------------------------------------------------------------------------------------------------------------------------------------------------------------------------------------------------------------------------------------------------------------------------------------------------------------------------------------------------------------------------------------------------------------------------------------------------------------|
|                       | Comprehensive Psychiatric Emergency Program (CPEP) | Rate code '4007','4008','4009','4010', '4049'                                                                                                                                                                                                                                                                                                                                                                                                                                                                                                                                                                               |
| Substance Use         | Substance Use Emergency Room                       | <ol style="list-style-type: none"> <li>1. 'Rate code '1402', '1419', '2879' and Mental Health Diagnosis</li> <li>2. Proc code '99281', '99282', '99283', '99284', '99285' and Mental Health Diagnosis and RECORD_CODE_H002='4' and PROVIDER TYPE CODE IN ('028','MLT')</li> <li>3. Spec code '901' and Mental Health Diagnosis and RECORD_CODE_H002='4' and (Category of Service='0287' or PROVIDER TYPE CODE IN ('028','MLT'))</li> <li>3. Rev Code '0450', '0451', '0452', '0459' and Mental Health Diagnosis and RECORD_CODE_H002='4' and (Category of Service='0287' or PROVIDER TYPE CODE IN ('028','MLT'))</li> </ol> |
| Non-Behavioral Health | Non-Behavioral Health Emergency                    | <ol style="list-style-type: none"> <li>1. invoice type '05' and non-BH primary Diagnosis and (Specialty code ('901', '250', '149') or Procedure ('99281', '99282', '99283', '99284', '99285', '99288') or Rate code ('1402', '1419', '2879')</li> <li>2. invoice type '01', '30' and non-BH primary Diagnosis and (Place of service ('23','20') or Procedure ('99281', '99282', '99283', '99284', '99285', '99288'))</li> </ol>                                                                                                                                                                                             |
